# Supplementary material for: Effect of Potassium Permanganate, Ultraviolet Radiation and Titanium Oxide as Ethylene Scavengers on Preservation of Postharvest Quality and Sensory Attributes of Broccoli Stored with Tomatoes
Source: MDPI journal article supplement (doi:10.3390/foods12122418), 2023-06-20
Supplement: s1 [file s1]

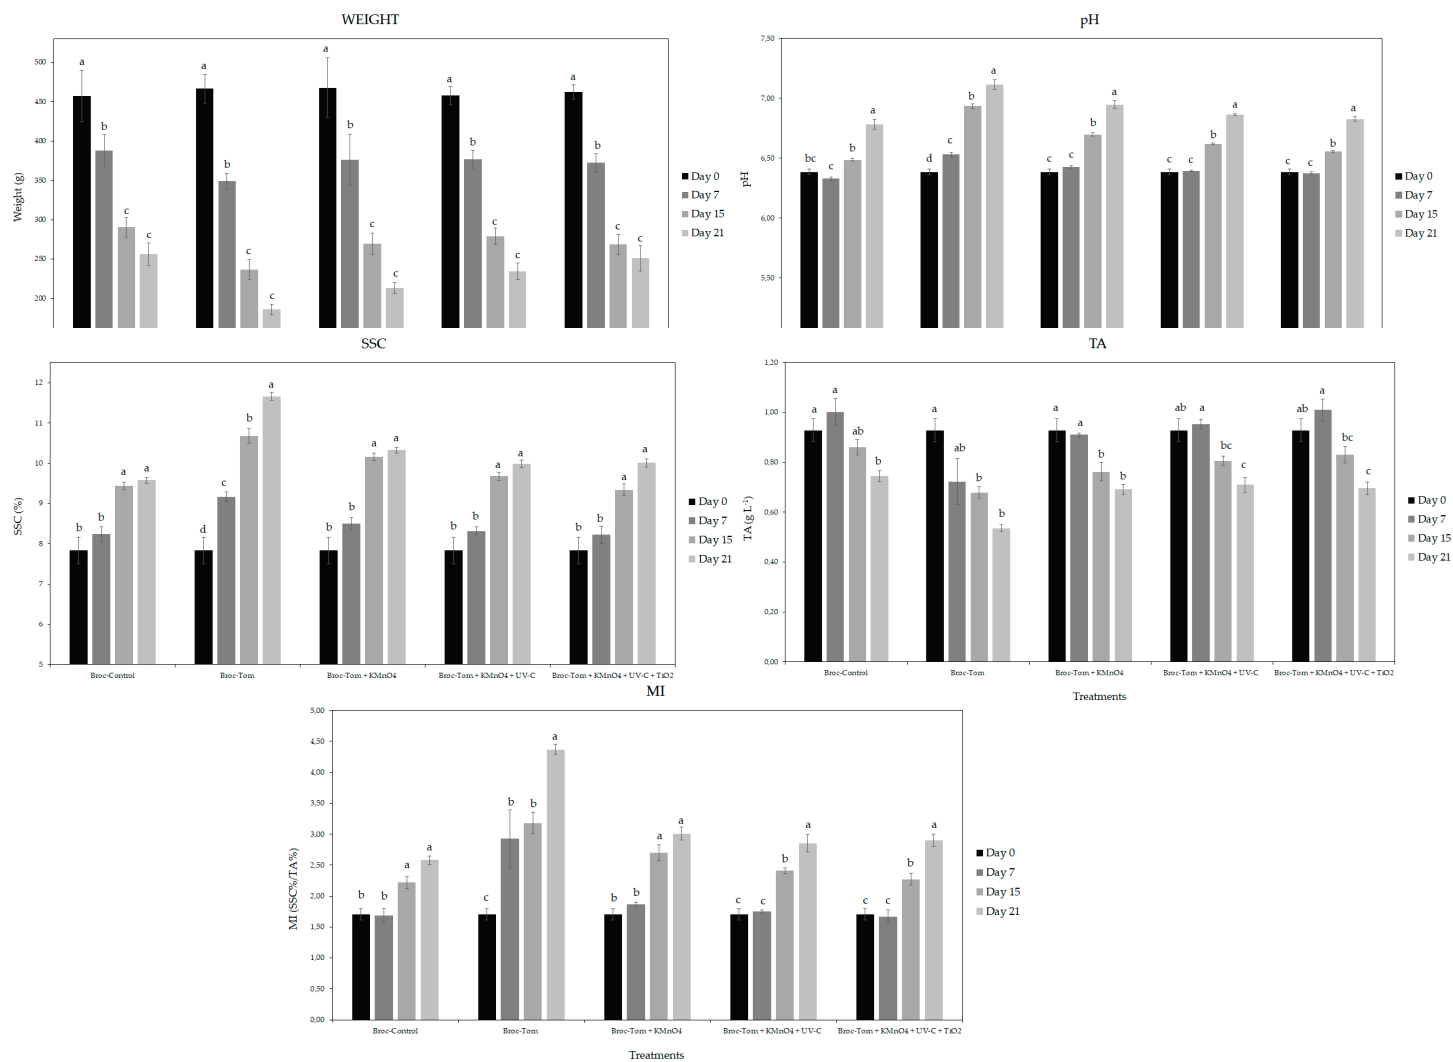

**Supplementary Figure S1.** Evolution during storage time of the broccoli's weight expressed in grams. pH. SSC expressed as percentage. TA expressed as  $\text{g L}^{-1}$  and MI expressed as the  $\text{SSC (\%)/TA (\%)}$  ratio subjected to different treatments (Broc-Control. Broc-Tom. Broc-Tom +  $\text{KMnO}_4$ . Broc-Tomato +  $\text{KMnO}_4$  + UV-C. Broc-Tom +  $\text{KMnO}_4$  + UV-C +  $\text{TiO}_2$ ). Different letters for each treatment represent statistically significant differences according to Tukey's test.  $n = 5$ . with the aim to see the evolution of each parameter on every treatment.

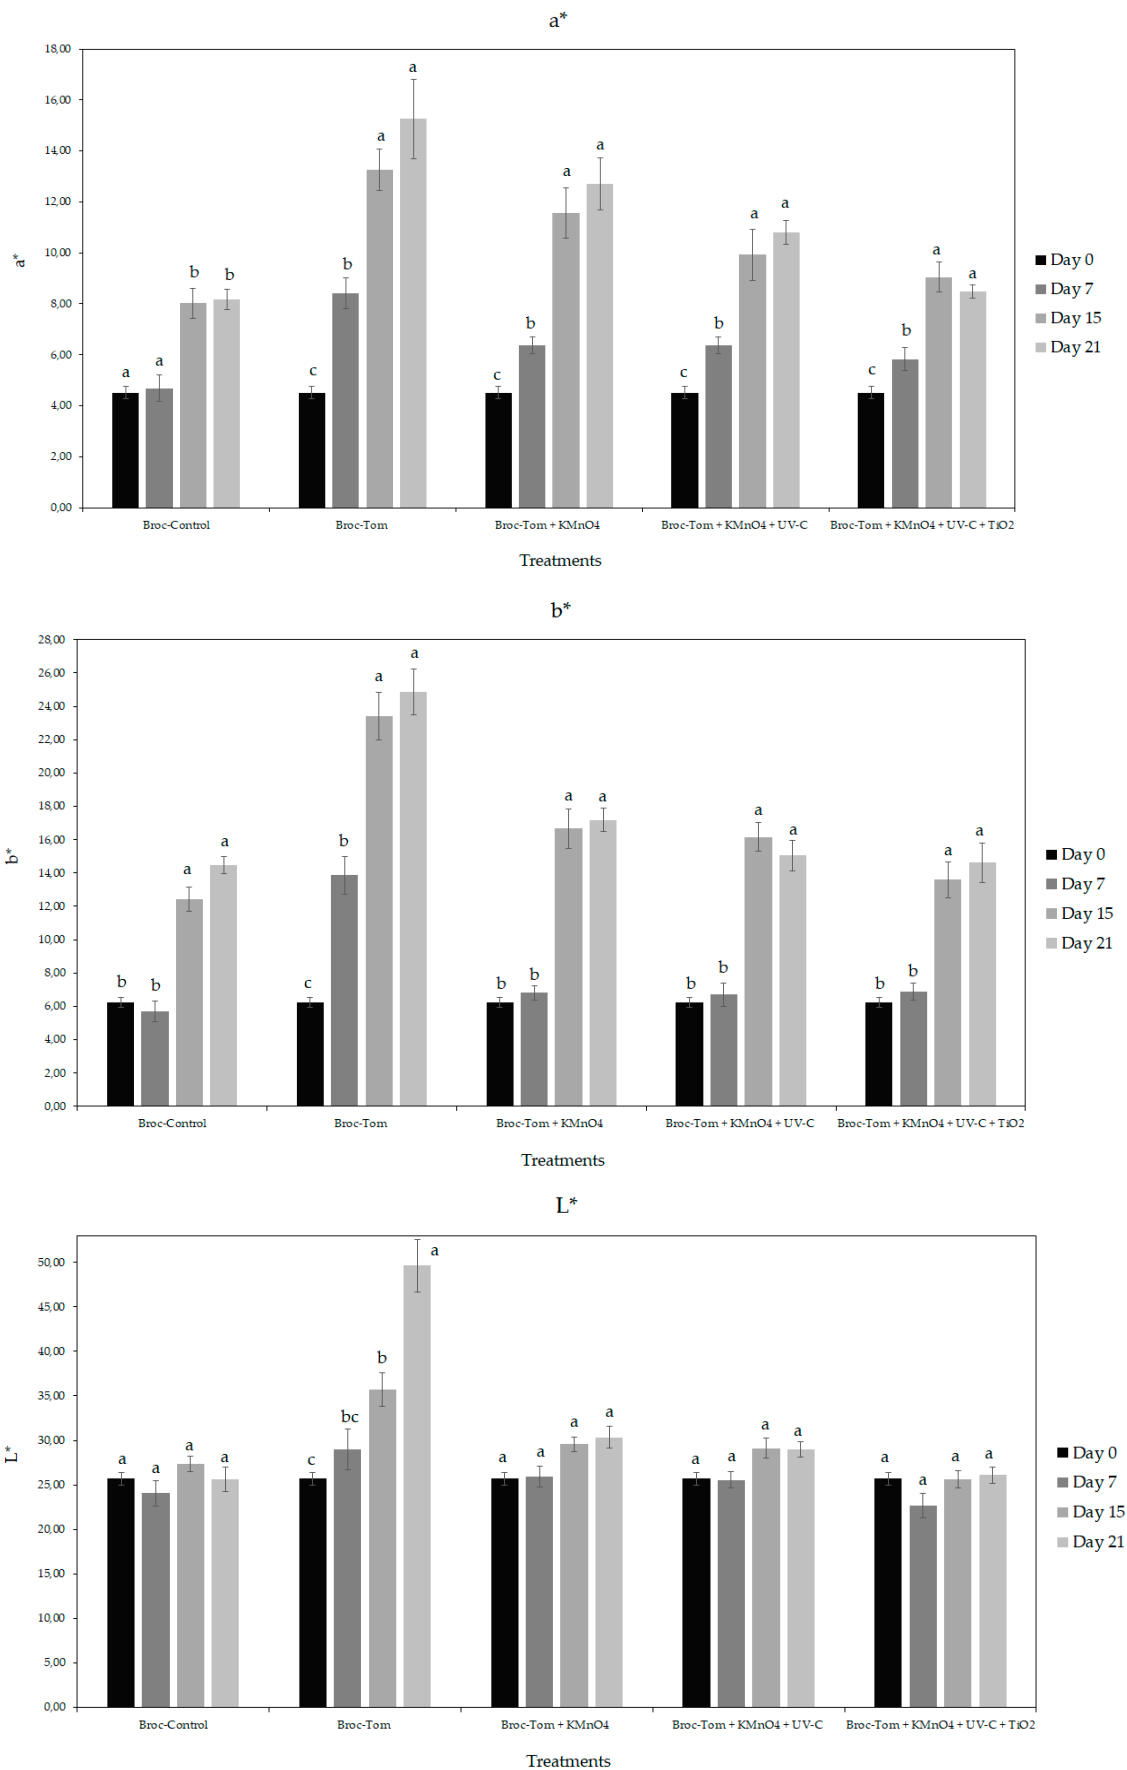

**Supplementary Figure S2.** Evolution during storage time of the colour parameters in broccoli subjected to different treatments (Broc-Control, Broc-Tomato, Broc-Tom + KMnO<sub>4</sub>, Broc-Tom + KMnO<sub>4</sub> + UV-C, Broc-Tom + KMnO<sub>4</sub> + UV-C + TiO<sub>2</sub>). The parameters measured were a\* (a); b\* (b) and L\* (c). Different letters for each treatment represent statistically significant differences according to Tukey's test. n = 5, with the aim to see the evolution of each parameter on every treatment

**Supplementary Table S1.** Evolution from day 0 to day 21 of the weight expressed in grams and maturity variables as solid soluble content (SSC) expressed as percentage; pH; Total acidity (TA) expressed as g L<sup>-1</sup> and mature index (MI) as the SSC (%) / TA (%) ratio in broccoli subjected to the different treatments (Broc-Control, Broc-Tomato, Broc-Tom + KMnO<sub>4</sub>, Broc-Tom + KMnO<sub>4</sub> + UV-C, Broc-Tom + KMnO<sub>4</sub> + UV-C + TiO<sub>2</sub>). The means  $\pm$  standard error of the means (SEM) are shown. Different letters for each treatment represent statistically significant differences according to Tukey's test. n = 5 per treatment and day.

| Storage days | Treatment                                              | Weight (g)            | SSC (%)             | pH                 | TA (g L <sup>-1</sup> ) | MI (SSC/TA)        |
|--------------|--------------------------------------------------------|-----------------------|---------------------|--------------------|-------------------------|--------------------|
| 0            | All                                                    | 449.47 $\pm$ 11.44    | 7.83 $\pm$ 0.33     | 6.39 $\pm$ 0.03    | 0.93 $\pm$ 0.05         | 1.70 $\pm$ 0.09    |
| 7            | Broc-Control                                           | 387.91 $\pm$ 20.13 a  | 8.24 $\pm$ 0.19 b   | 6.33 $\pm$ 0.01 d  | 1.00 $\pm$ 0.05 a       | 1.69 $\pm$ 0.11 b  |
|              | Broc-Tomato                                            | 348.83 $\pm$ 10.37 a  | 9.16 $\pm$ 0.12 a   | 6.53 $\pm$ 0.02 a  | 0.72 $\pm$ 0.09 b       | 2.93 $\pm$ 0.47 a  |
|              | Broc-Tom + KMnO <sub>4</sub>                           | 376.07 $\pm$ 32.78 a  | 8.50 $\pm$ 0.15 ab  | 6.43 $\pm$ 0.01 b  | 0.91 $\pm$ 0.01 ab      | 1.87 $\pm$ 0.03 b  |
|              | Broc-Tom + KMnO <sub>4</sub> + UV-C                    | 376.67 $\pm$ 11.51 a  | 8.32 $\pm$ 0.10 b   | 6.39 $\pm$ 0.01 bc | 0.95 $\pm$ 0.02 a       | 1.75 $\pm$ 0.03 b  |
|              | Broc-Tom + KMnO <sub>4</sub> + UV-C + TiO <sub>2</sub> | 404.06 $\pm$ 11.69 a  | 8.22 $\pm$ 0.22 b   | 6.37 $\pm$ 0.01 cd | 1.01 $\pm$ 0.04 a       | 1.66 $\pm$ 0.11 b  |
| 15           | Broc-Control                                           | 290.48 $\pm$ 12.30 a  | 9.44 $\pm$ 0.10 c   | 6.49 $\pm$ 0.01 e  | 0.86 $\pm$ 0.03 a       | 2.22 $\pm$ 0.10 b  |
|              | Broc-Tomato                                            | 236.52 $\pm$ 13.13 b  | 10.68 $\pm$ 0.18 a  | 6.94 $\pm$ 0.02 a  | 0.68 $\pm$ 0.02 b       | 3.18 $\pm$ 0.17 a  |
|              | Broc-Tom + KMnO <sub>4</sub>                           | 269.45 $\pm$ 13.18 ab | 10.16 $\pm$ 0.09 ab | 6.70 $\pm$ 0.01 b  | 0.76 $\pm$ 0.04 ab      | 2.70 $\pm$ 0.13 ab |
|              | Broc-Tom + KMnO <sub>4</sub> + UV-C                    | 278.75 $\pm$ 10.49 a  | 9.68 $\pm$ 0.10 bc  | 6.62 $\pm$ 0.01 c  | 0.81 $\pm$ 0.02 a       | 2.41 $\pm$ 0.05 b  |
|              | Broc-Tom + KMnO <sub>4</sub> + UV-C + TiO <sub>2</sub> | 326.17 $\pm$ 12.58 a  | 9.34 $\pm$ 0.15 c   | 6.55 $\pm$ 0.01 d  | 0.83 $\pm$ 0.03 a       | 2.27 $\pm$ 0.09 b  |
| 21           | Broc-Control                                           | 256.06 $\pm$ 14.09 a  | 9.58 $\pm$ 0.07 c   | 6.78 $\pm$ 0.04 c  | 0.75 $\pm$ 0.04 a       | 2.58 $\pm$ 0.06 c  |
|              | Broc-Tomato                                            | 186.04 $\pm$ 6.59 b   | 11.66 $\pm$ 0.10 a  | 7.12 $\pm$ 0.04 a  | 0.54 $\pm$ 0.04 b       | 4.37 $\pm$ 0.08 a  |
|              | Broc-Tom + KMnO <sub>4</sub>                           | 213.11 $\pm$ 6.99 ab  | 10.33 $\pm$ 0.07 b  | 6.95 $\pm$ 0.03 b  | 0.69 $\pm$ 0.03 a       | 3.01 $\pm$ 0.10 b  |
|              | Broc-Tom + KMnO <sub>4</sub> + UV-C                    | 234.27 $\pm$ 10.89 ab | 9.99 $\pm$ 0.09 b   | 6.87 $\pm$ 0.01 bc | 0.71 $\pm$ 0.01 a       | 2.86 $\pm$ 0.14 bc |
|              | Broc-Tom + KMnO <sub>4</sub> + UV-C + TiO <sub>2</sub> | 300.35 $\pm$ 16.18 a  | 10.01 $\pm$ 0.10 b  | 6.83 $\pm$ 0.02 bc | 0.70 $\pm$ 0.02 a       | 2.90 $\pm$ 0.10 bc |

**Supplementary Table S2.** Evolution from day 0 to day 21 of the colour variables in broccoli subjected to the different treatments (Broc-Control, Broc-Tomato, Broc-Tom + KMnO<sub>4</sub>, Broc-Tom + KmnO<sub>4</sub> + UV-C, Broc-Tom + KmnO<sub>4</sub> + UV-C + TiO<sub>2</sub>). The parameters measured were a\*, b\* and L\*. The means  $\pm$  standard error of the means (SEM) are shown. Different letters for each treatment represent statistically significant differences according to Tukey's test. n = 5 per treatment and day.

| Storage days | Treatment                                              | a*                   | b*                 | L*                 |
|--------------|--------------------------------------------------------|----------------------|--------------------|--------------------|
| 0            | All                                                    | -4.52 $\pm$ 0.23     | 6.26 $\pm$ 0.30    | 25.69 $\pm$ 0.68   |
| 7            | Broc-Control                                           | -4.69 $\pm$ 0.51 a   | 5.69 $\pm$ 0.60 b  | 24.06 $\pm$ 1.46 a |
|              | Broc-Tomato                                            | -8.42 $\pm$ 0.61 b   | 13.87 $\pm$ 1.12 a | 28.99 $\pm$ 2.26 a |
|              | Broc-Tom + KmnO <sub>4</sub>                           | -6.37 $\pm$ 0.32 a   | 6.80 $\pm$ 0.44 b  | 25.92 $\pm$ 1.17 a |
|              | Broc-Tom + KmnO <sub>4</sub> + UV-C                    | -6.37 $\pm$ 0.34 a   | 6.71 $\pm$ 0.69 b  | 25.52 $\pm$ 0.92 a |
|              | Broc-Tom + KmnO <sub>4</sub> + UV-C + TiO <sub>2</sub> | -5.83 $\pm$ 0.45 a   | 6.88 $\pm$ 0.53 b  | 22.71 $\pm$ 1.38 a |
| 15           | Broc-Control                                           | -8.03 $\pm$ 0.59 a   | 12.45 $\pm$ 0.72 b | 27.37 $\pm$ 0.86 b |
|              | Broc-Tomato                                            | -13.27 $\pm$ 0.81 c  | 23.43 $\pm$ 1.43 a | 35.73 $\pm$ 1.90 a |
|              | Broc-Tom + KmnO <sub>4</sub>                           | -11.57 $\pm$ 0.98 bc | 16.66 $\pm$ 1.17 b | 29.55 $\pm$ 0.77 b |
|              | Broc-Tom + KmnO <sub>4</sub> + UV-C                    | -9.93 $\pm$ 1.00 abc | 16.17 $\pm$ 0.84 b | 29.13 $\pm$ 1.16 b |
|              | Broc-Tom + KmnO <sub>4</sub> + UV-C + TiO <sub>2</sub> | -9.05 $\pm$ 0.59 ab  | 13.59 $\pm$ 1.05 b | 25.63 $\pm$ 0.94 b |
| 21           | Broc-Control                                           | -8.17 $\pm$ 0.39 a   | 14.45 $\pm$ 0.52 b | 25.63 $\pm$ 1.41 a |
|              | Broc-Tomato                                            | -15.26 $\pm$ 1.56 c  | 24.86 $\pm$ 1.36 a | 49.63 $\pm$ 2.96 b |
|              | Broc-Tom + KmnO <sub>4</sub>                           | -12.69 $\pm$ 1.02 bc | 17.18 $\pm$ 0.69 b | 30.33 $\pm$ 1.22 a |
|              | Broc-Tom + KmnO <sub>4</sub> + UV-C                    | -10.80 $\pm$ 0.47 ab | 15.04 $\pm$ 0.94 b | 28.95 $\pm$ 0.86 a |
|              | Broc-Tom + KmnO <sub>4</sub> + UV-C + TiO <sub>2</sub> | -8.48 $\pm$ 0.27 a   | 14.61 $\pm$ 1.19 b | 26.11 $\pm$ 0.92 a |

**Supplementary Table S3.** Principal Component Analysis

| <i>Component</i> | <i>Eigenvalue</i> | <i>Percentage of Variance</i> | <i>Percentage Cumulative</i> |
|------------------|-------------------|-------------------------------|------------------------------|
| 1                | 8.99666           | 74.972                        | 74.972                       |
| 2                | 0.959885          | 7.999                         | 82.971                       |
| 3                | 0.584659          | 4.872                         | 87.843                       |
| 4                | 0.449655          | 3.747                         | 91.590                       |
| 5                | 0.392415          | 3.270                         | 94.861                       |
| 6                | 0.22385           | 1.865                         | 96.726                       |
| 7                | 0.15998           | 1.333                         | 98.059                       |
| 8                | 0.137825          | 1.149                         | 99.208                       |
| 9                | 0.0543274         | 0.453                         | 99.660                       |
| 10               | 0.0308153         | 0.257                         | 99.917                       |
| 11               | 0.00594387        | 0.050                         | 99.967                       |
| 12               | 0.00398482        | 0.033                         | 100.000                      |

**Supplementary Figure S3.** Sedimentation graph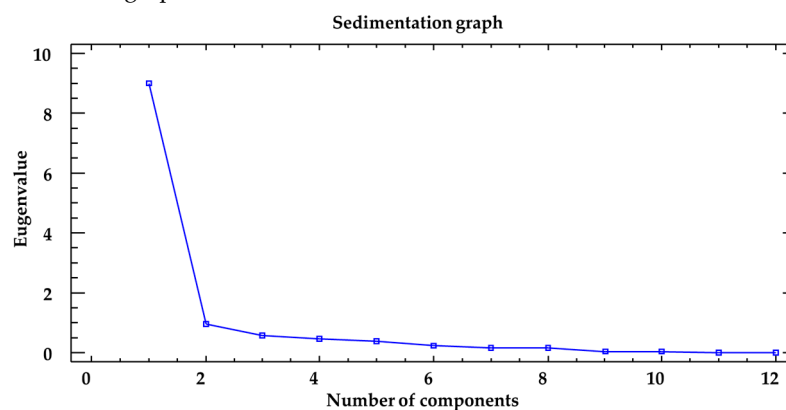**Supplementary Table S4.** Table of Component Weights

|                   | <i>Component</i> | <i>Component</i> |
|-------------------|------------------|------------------|
|                   | 1                | 2                |
| Weight            | 0.270102         | -0.0855683       |
| pH                | <b>-0.304243</b> | 0.153234         |
| SSC               | <b>-0.312978</b> | -0.139678        |
| TA                | 0.296331         | 0.0863789        |
| MI                | <b>-0.317859</b> | -0.0894007       |
| TPC               | <b>0.312048</b>  | 0.0834933        |
| chlorophyll a     | 0.142592         | <b>0.890264</b>  |
| chlorophyll b     | 0.291496         | -0.327893        |
| Total chlorophyll | <b>0.30604</b>   | -0.138452        |
| a*                | 0.262856         | -0.0363338       |
| b*                | -0.299334        | 0.038533         |
| L                 | <b>-0.304382</b> | 0.0721456        |

**Supplementary Figure S4.** Graphical representation of the principal components marking with lines for each variable and wit points for each score

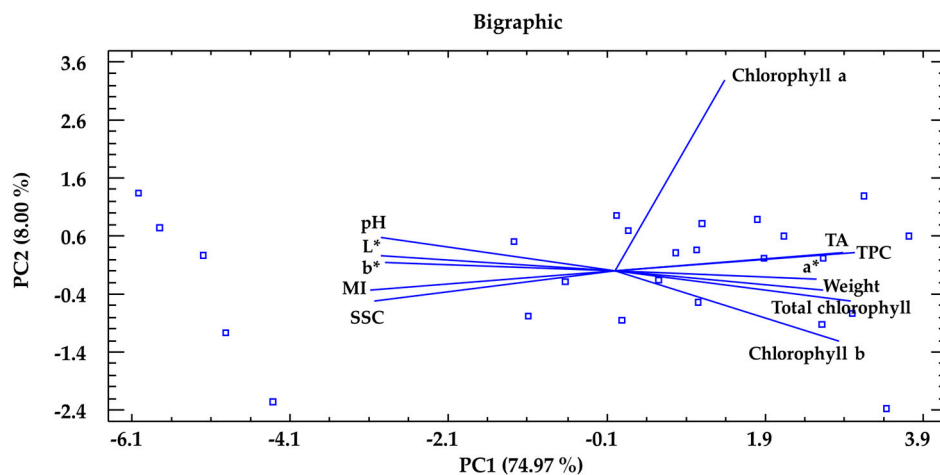

**Supplementary Table S5a.** This table shows the scores of the principal components

| Row | Label                                             | Component 1 | Component 2 | Average Component 1 | Average Component 2 |
|-----|---------------------------------------------------|-------------|-------------|---------------------|---------------------|
| 1   | Broc_Control                                      | 3.70429     | 0.610437    | <b>3.10</b>         | <b>-0.23</b>        |
| 2   | Broc_Control                                      | 2.60783     | -0.926669   |                     |                     |
| 3   | Broc_Control                                      | 3.42372     | -2.36199    |                     |                     |
| 4   | Broc_Control                                      | 2.62453     | 0.211814    |                     |                     |
| 5   | Broc_Control                                      | 3.15305     | 1.30035     |                     |                     |
| 6   | Broc_Tom                                          | -6.01123    | 1.33619     | <b>-5.24</b>        | <b>-0.19</b>        |
| 7   | Broc_Tom                                          | -5.74895    | 0.734612    |                     |                     |
| 8   | Broc_Tom                                          | -4.31414    | -2.24397    |                     |                     |
| 9   | Broc_Tom                                          | -4.91569    | -1.05556    |                     |                     |
| 10  | Broc_Tom                                          | -5.1909     | 0.272023    |                     |                     |
| 11  | Broc_Tom_KMnO <sub>4</sub>                        | -1.26641    | 0.511595    | <b>-0.56</b>        | <b>0.24</b>         |
| 12  | Broc_Tom_KMnO <sub>4</sub>                        | -1.08945    | -0.781102   |                     |                     |
| 13  | Broc_Tom_KMnO <sub>4</sub>                        | 0.0262665   | 0.963006    |                     |                     |
| 14  | Broc_Tom_KMnO <sub>4</sub>                        | -0.621164   | -0.196527   |                     |                     |
| 15  | Broc_Tom_KMnO <sub>4</sub>                        | 0.168601    | 0.688498    |                     |                     |
| 16  | Broc_Tom_KMnO <sub>4</sub> _UV-C                  | 1.10642     | 0.813546    | <b>0.88</b>         | <b>0.07</b>         |
| 17  | Broc_Tom_KMnO <sub>4</sub> _UV-C                  | 0.0947379   | -0.842801   |                     |                     |
| 18  | Broc_Tom_KMnO <sub>4</sub> _UV-C                  | 1.88204     | 0.223272    |                     |                     |
| 19  | Broc_Tom_KMnO <sub>4</sub> _UV-C                  | 0.546688    | -0.165926   |                     |                     |
| 20  | Broc_Tom_KMnO <sub>4</sub> _UV-C                  | 0.777532    | 0.310271    |                     |                     |
| 21  | Broc_Tom_KMnO <sub>4</sub> _UV-C_TiO <sub>2</sub> | 3.00495     | -0.72326    | <b>1.81</b>         | <b>0.12</b>         |
| 22  | Broc_Tom_KMnO <sub>4</sub> _UV-C_TiO <sub>2</sub> | 2.14079     | 0.596155    |                     |                     |
| 23  | Broc_Tom_KMnO <sub>4</sub> _UV-C_TiO <sub>2</sub> | 1.03713     | 0.36686     |                     |                     |
| 24  | Broc_Tom_KMnO <sub>4</sub> _UV-C_TiO <sub>2</sub> | 1.80282     | 0.889211    |                     |                     |
| 25  | Broc_Tom_KMnO <sub>4</sub> _UV-C_TiO <sub>2</sub> | 1.05652     | -0.530034   |                     |                     |

**Supplementary Table S5b.** ANOVA table for the component 1 scores according to the treatments

| Source        | Sum of squares | FD | Mean Square | F-Ratio       | P-Value       |
|---------------|----------------|----|-------------|---------------|---------------|
| Intergroup    | 207.007        | 4  | 51.7517     | <b>116.12</b> | <b>0.0000</b> |
| Intragroup    | 8.91318        | 20 | 0.445659    |               |               |
| Total (Corr.) | 215.92         | 24 |             |               |               |

**Supplementary Table S5c.** Multiple comparisons test for the component 1 scores by treatments using Tukey HSD method

| Treatments                                       | Replicates | Mean      | Homogenous groups |
|--------------------------------------------------|------------|-----------|-------------------|
| Broc_Tom                                         | 5          | -5.23618  | e                 |
| Broc_Tom_KMnO <sub>4</sub>                       | 5          | -0.556431 | d                 |
| Broc_Tom_KMnO <sub>4</sub> _UVC                  | 5          | 0.881484  | c                 |
| Broc_Tom_KMnO <sub>4</sub> _UVC_TiO <sub>2</sub> | 5          | 1.80844   | b                 |
| Broc_Control                                     | 5          | 3.10268   | a                 |

**Supplementary Table S5d.** ANOVA table for the component 2 scores according to the treatments

| Source        | Sum of squares | FD | Mean Square | F-Ratio     | P-Value       |
|---------------|----------------|----|-------------|-------------|---------------|
| Intergroup    | 0.830705       | 4  | 0.207676    | <b>0.19</b> | <b>0.9424</b> |
| Intragroup    | 22.2065        | 20 | 1.11033     |             |               |
| Total (Corr.) | 23.0372        | 24 |             |             |               |

**Supplementary Table S5e.** Multiple comparisons test for the component 2 scores by treatments using Tukey HSD method

| <i>Treatments</i>       | <i>Replicates</i> | <i>Mean</i> | <i>Homogenous groups</i> |
|-------------------------|-------------------|-------------|--------------------------|
| Broc_Control            | 5                 | -0.233212   | a                        |
| Broc_Tom                | 5                 | -0.191341   | a                        |
| Broc_Tom_KMnO4_UVC      | 5                 | 0.0676724   | a                        |
| Broc_Tom_KMnO4_UVC_TiO2 | 5                 | 0.119786    | a                        |
| Broc_Tom_KMnO4          | 5                 | 0.237094    | a                        |
